# Supplementary material
Source: publisher figshare collection journal article supplement (https://tandf.figshare.com/articles/dataset/_/9772256)
Supplement: Supplementary file 1 [file 3]

Archive with 2 entries (2 files):
- ierm_a_1648209_sm4356.pdf
- ierm_a_1648209_sm2172.docx
