# Supplementary material
Source: publisher figshare collection journal article supplement (https://tandf.figshare.com/articles/dataset/_/9772256)
Supplement: Supplementary file 1 [file 3 › ierm_a_1648209_sm2172.docx]

**Supplementary Tables**

**Supplementary Table 1: Genetic abnormalities observed in some patients with GPP**

| **Gene** | **Protein and function** | **Mutation and consequences in GPP** |
| --- | --- | --- |
| *IL36RN*  (location 2q14.1) [[38](#_ENREF_38)] | IL-36RA  Negative regulator of IL-36 signaling | >12 mutations in *IL36RN* reported in GPP; loss of function; homozygous or composite heterozygous [[18](#_ENREF_18),[33](#_ENREF_33),[34](#_ENREF_34)] and autosomal recessive in some cases [[35](#_ENREF_35),[41](#_ENREF_41)]  Results in dysregulation of cytokines IL-36α, IL-36β, or IL-36γ, which bind to IL-36 receptor and lead to activation of pro‑inflammatory pathway (via NF-κB and MAPK) [[18](#_ENREF_18)] |
| *CARD14*  (location 17q25.3) [[39](#_ENREF_39)] | Protein unknown  Activator of NF-κB | >3 mutations in *CARD14* reported in GPP; gain of function; heterozygous; also found in patients with autosomal dominant plaque psoriasis [[42](#_ENREF_42)] and in some patients with PRP [[43](#_ENREF_43)]  Results in enhanced expression of IL-36γ (⇒ activation of pro-inflammatory pathway) [[44](#_ENREF_44)] |
| *AP1S3*  (location: 2q36.1) [[40](#_ENREF_40)] | AP-1 complex subunit sigma 3  One of the AP complexes that is involved in claathrin-mediated vesicular transport from Golgi or endosomes | Loss of function; heterozygous  Results in disruption of Toll-like receptor 3–mediated activation of interferon-β, which normally downregulates IL-1 [[20](#_ENREF_20)]; *AP1S3*-deficient cells upregulate IL-1 and overexpress IL-36α (⇒ activation of pro-inflammatory pathway) [[45](#_ENREF_45)] |

AP: activator protein; *AP1S3*: adaptor protein complex 1 subunit sigma 3 gene; *CARD14*: caspase-activating recruitment domain member 14 gene; GPP: generalized pustular psoriasis; *IL36RN*: interleukin-36 receptor antagonist (RA) gene; MAPK: mitogen-activated protein kinase; NF‑κB: nuclear factor kappa-B; PRP: pityriasis rubra pilaris; q: chromosome long arm.

**Supplementary Table 2: Ongoing and completed clinical trials of biologic agents in pustular psoriasis**

| **Clinical Trials Identifier** | **Study Title** | **Study Details** | **Biologic and**  **Study Sponsor** | **Study URL** |
| --- | --- | --- | --- | --- |
| NCT01794117 | Anakinra for Inflammatory Pustular Skin Diseases | Phase 2, open label, single group; ≥18 years; N=30 (estimated)  *Recruiting* | Anakinra  NIAMS, NCI, NIHCC | https://clinicaltrials.gov/ct2/show/record/NCT01794117?term=NCT01794117 |
| NCT03619902 | A Study to Evaluate the Efficacy and Safety of ANB019 in Subjects With Generalized Pustular Psoriasis | Phase 2, open label, single group; 18 to 65 years; N=10 (estimated)  *Recruiting* | ANB019  AnaptysBio, Inc. | https://clinicaltrials.gov/ct2/show/NCT03619902?term=NCT03619902 |
| NCT03051217 | A Study to Test the Efficacy and Safety of Certolizumab Pegol in Japanese Subjects With Moderate to Severe Chronic Psoriasis  (NB: Psoriasis including GPP) | Phase 2/3, randomized, placebo controlled, double-blind; ≥20 years; N=149 (actual)  *Active, not recruiting* | Certolizumab  UCB Biopharma S.P.R.L. | https://clinicaltrials.gov/ct2/show/NCT03051217?term=NCT03051217 |
| NCT03022045 | A Study to Assess Efficacy and Safety of Two Different Dose Regimens of Risankizumab Administered Subcutaneously in Japanese Subjects With Generalized Pustular Psoriasis or Erythrodermic Psoriasis | Phase 3, open label, parallel group (two doses risankizumab); ≥20 years; N=17 (actual)  *Active, not recruiting* | Risankizumab  AbbVie | https://clinicaltrials.gov/ct2/show/NCT03022045?term=NCT03022045 |
| NCT02343744 | An Efficacy and Safety Study of CNTO1959 (Guselkumab) in the Treatment of Participants With Generalized Pustular Psoriasis or Erythrodermic Psoriasis | Phase 3, open label, single group; ≥20 years; N=21 (actual)  *Active, not recruiting* | Guselkumab  Janssen Pharmaceutical K.K. | https://clinicaltrials.gov/ct2/show/NCT02343744?term=NCT02343744 |
| EudraCT #  2015-003600-23 | APRICOT - Anakinra for Pustular psoriasis: Response in a Controlled Trial | Phase 4, randomized, placebo controlled, double blind; ≥18 years; N=64 (estimated)  *Recruiting* | Anakinra  Guys and Thomas NHS Foundation Trust | https://www.clinicaltrialsregister.eu/ctr-search/trial/2015-003600-23/GB |
| NCT01680159 | A Clinical Study of Increased Dose of TA-650 in Patients With Psoriasis  (NB: Psoriasis including GPP) | Phase 3, open label, single group; 16 to 75 years; N=51  *Completed (Mar 2015)* | TA-650 (infliximab)  Mitsubishi Tanabe Pharma Corporation | https://clinicaltrials.gov/ct2/show/NCT01680159?term=NCT01680159 |
| NCT01952015 | Study to Assess the Efficacy, Safety and Tolerability of Secukinumab in Japanese Subjects With Generalized Pustular Psoriasis (GPP) | Phase 3, open label, single group; ≥18 years; N=12  *Completed (Mar 2016)* | Secukinumab  Novartis Pharmaceuticals | https://clinicaltrials.gov/ct2/show/record/NCT01952015?term=NCT01952015 |
| NCT02052609 | A Phase 3 Clinical Study of KHK 4827  (NB: Psoriasis including GPP) | Phase 3, open label, parallel group (two doses KHK 4827); ≥18 years; N=155  *Completed (Dec 2016)* | KHK 4827 (brodalumab)  Kyowa Hakko Kirin Co., Ltd | https://clinicaltrials.gov/ct2/show/record/NCT02052609?term=NCT02052609 |
| NCT02008890 | Palmoplantar Pustular Psoriasis Efficacy and Safety with Secukinumab | Phase 3, randomized, placebo controlled, double blind; ≥18 years; N=237  *Completed (May 2017)* | Secukinumab  Novartis Pharmaceuticals | https://clinicaltrials.gov/ct2/show/NCT02008890?term=NCT02008890 |
| NCT02533375 | Study to Investigate Efficacy and Safety of Adalimumab in Japanese Subjects With Generalized Pustular Psoriasis (GPP) | Phase 3, open label, single group; 15 to 75 years; N=10  *Completed (Jul 2017)* | Adalimumab  AbbVie | https://clinicaltrials.gov/ct2/show/record/NCT02533375?term=NCT02533375 |
| NCT02978690 | BI655130 Single Dose in Generalized Pustular Psoriasis | Phase 1, open label, single group; 18 to 75 years; N=7  *Completed (Jan 2018)* | BI655130 (anti-IL-36 receptor)  Boehringer Ingelheim | https://clinicaltrials.gov/ct2/show/NCT02978690?term=NCT02978690 |

GPP: generalized pustular psoriasis; IL: interleukin; NCI: National Cancer Institute; NCT: National Clinical Trials; NIAMS: National Institute of Arthritis and Musculoskeletal and Skin Diseases; NIHCC: National Institutes of Health Clinical Center.
